# Supplementary material for: Synergistic effect between carbon nanoparticle and intumescent flame retardant on flammability and smoke suppression of copolymer thermoplastic polyurethane
Source: Springer Nature journal article supplement (doi:10.1007/s10853-017-1970-0), 2018-01-03
Supplement: MOESM1 [file 15341558]

## Mechanical properties

Fig. 12 Tensile measurements for each nanocomposites; a TS and EB refer to the tensile strength and elongation at break, respectively
